# Supplementary material
Source: publisher figshare collection journal article supplement (https://acs.figshare.com/ndownloader/files/3703090)
Supplement: Supplementary file 1 [file 3703090]

Compound	SMILES		S1P1 GTPgS	Sd	N in mean		S1P1 Arrestin pEC50	SD	N in mean			S1P3 GTPgS	SD	N in mean		AVG_CHROM_LOGD_PH7_4
13	OC(=O)C(F)(F)F.CC(C)Oc1ccc(cc1Cl)-c1nnc(NCCN)s1	<	4.5		7
14	OC(=O)C(F)(F)F.CC(C)Oc1ccc(cc1Cl)-c1nnc(NCCNCCC(O)=O)s1	<	4.5		4
15	OC=O.CC(C)Oc1ccc(cc1Cl)-c1nnc(s1)N1CCNCC1	=	5.2	0.34	3
16	OC(=O)C(F)(F)F.CC(C)Oc1ccc(cc1Cl)-c1nnc(NC2CCN(CC(O)=O)CC2)s1	=	5.6	0.04	2
17	OC=O.CC(C)Oc1ccc(cc1Cl)-c1nnc(s1)C1=CCNCC1	=	5.8	0.12	4
18	OC=O.OC=O.CC(C)Oc1ccc(cc1Cl)-c1nnc(s1)N1CCC(CC1)N1CCCC(C1)C(O)=O	=	5.4	0.08	3
19	CC(C)Oc1ccc(cc1Cl)-c1nnc(Nc2ccc(CC(O)=O)cc2)s1	=	5.9	0.19	2
20	CC(C)Oc1ccc(cc1Cl)-c1nnc(s1)N1CCOc2c(CCC(O)=O)cccc12	=	6.6	0.03	2
21	[Li+].CC(C)Oc1ccc(cc1Cl)-c1nnc(s1)N1CCc2cc(CCC([O-])=O)ccc12	=	7	0.03	2
22	CC(C)Oc1ccc(cc1Cl)-c1nnc(s1)-c1ccccc1	=	6.6	0.02	2						=	4.7		1		8.65
23	CC(C)Oc1ccc(cc1Cl)-c1nnc(s1)-c1cn[nH]c1	=	6.2	0.64	10						<	4.5		10		5
24	CC(C)Oc1ccc(cc1Cl)-c1nnc(s1)-n1cncn1	=	6.3	0.13	3						<	4.5		4		6.18
25	CC(C)Oc1ccc(cc1Cl)-c1nnc(s1)-c1ccno1	=	6	1.38	2						<	4.5		2		6.93
26	CC(C)Oc1ccc(cc1Cl)-c1nnc(s1)-c1c[nH]nc1C	=	6.9	0.42	8						<	4.5		8		5.45
27	CC(C)Oc1ccc(cc1Cl)-c1nnc(s1)-c1ccnn1C	=	6.6	0.3	2						<	4.5		1		7.04
28	CC(C)Oc1ccc(cc1Cl)-c1nnc(s1)-c1sc(C)nc1C	=	6.6	0.11	3						<	4.5		2		7.76
29	CC(C)Oc1ccc(cc1Cl)-c1nnc(s1)-c1cncn1C	=	7.2	0.05	2						<	4.5		2		5.7
30	CC(C)Oc1ccc(cc1Cl)-c1nnc(s1)-c1cnn(CC(O)=O)c1	=	4.6		1						<	4.5		4		2.82
31	CC(C)Oc1ccc(cc1Cl)-c1nnc(s1)-n1nc(C)c(CC(O)=O)c1C	=	6	0.59	7	=	5.8	0.26	4		<	4.5		7		3.62
32	CC(C)Oc1ccc(cc1Cl)-c1nnc(s1)-n1nc(C)c(CCC(O)=O)c1C	=	7.4	0.38	7	=	7.7	0.14	6		<	4.5		9		4.3
33	CC(C)Oc1ccc(cc1Cl)-c1nnc(s1)-c1cn(CCC(O)=O)nc1C	=	5.6	0	2						<	4.5		3		3.16
34	CC(C)Oc1ccc(cc1Cl)-c1nnc(s1)-c1cnn(CCN2CCOCC2)c1	=	5	0.17	3						<	4.5		4		5.59
35	OC(=O)C(F)(F)F.CC(C)Oc1ccc(cc1Cl)-c1nnc(s1)-n1cc2CNCCc2n1	=	6.2	0.19	2	=	6.2	0.34	6		<	4.5		2		4.44
36	OC(=O)C(F)(F)F.CC(C)Oc1ccc(cc1Cl)-c1nnc(s1)-n1ncc2CNCCc12	=	6.4	0.39	2	=	6.1	0.19	4		<	4.5		2		4.87
37	CC(C)Oc1ccc(cc1Cl)-c1nnc(s1)-n1nc2CCNCc2c1C	=	6.9	0.24	4	=	6.8	0.14	8		<	4.5		4		5.32
38	OC(=O)C(F)(F)F.CC(C)Oc1ccc(cc1C#N)-c1nnc(s1)-n1cc2CNCCc2n1	=	6.3	0.55	2	=	6.9	0.23	6		<	4.5		4		3.37
39	CC(C)Oc1ccc(cc1C#N)-c1nnc(s1)-n1nc2CCNCc2c1C	=	7	0.22	2	=	7.2	0.34	6		<	4.5		4		3.73
40	Cl.CC(C)Oc1ccc(cc1C#N)-c1nnc(s1)-n1nc2CNCCc2c1C					=	6.8	0.32	6		<	4.5		4		4.23
41	CC(C)Oc1ccc(cc1C#N)-c1nnc(s1)-n1nc2CCN(CC(O)=O)Cc2c1C					=	7	0.06	2		<	4.5		2		2.88
42	CC(C)Oc1ccc(cc1Cl)-c1nnc(s1)-n1cc2CN(CCC(O)=O)CCc2n1	=	7.9	0.15	6	=	8.4	0.15	6		<	4.5		10		3.26
43	OC(=O)C(F)(F)F.CC(C)Oc1ccc(cc1Cl)-c1nnc(s1)-n1nc2CCN(CCC(O)=O)Cc2c1C	=	8.2	0.31	14	=	8.8	0.21	18		<	4.5		4		3.73
44	CC(C)Oc1ccc(cc1C#N)-c1nnc(s1)-n1cc2CN(CCC(O)=O)CCc2n1	=	7.3	0.22	2	=	8.3	0.1	6		<	4.5		4		2.58
45	OC(=O)C(F)(F)F.CC(C)Oc1ccc(cc1C#N)-c1nnc(s1)-n1nc2CCN(CCC(O)=O)Cc2c1C	=	7.8	0.21	2	=	8.5	0.19	6		<	4.5		4		2.76
46	CC(C)Oc1ccc(cc1Cl)-c1nnc(s1)-n1ncc2CN(CCC(O)=O)CCc12	=	6.9	0.15	4	=	7.3	0.27	4		=	4.7	0.05	2		3.54
47	CC(C)Oc1ccc(cc1Cl)-c1nnc(s1)-n1cc2CN(CCCC(O)=O)CCc2n1	=	7.9	0.19	2	=	8.3	0.17	6		<	4.5		2		3.56
48	CC(C)Oc1ccc(cc1C#N)-c1nnc(s1)-n1cc2CN(CCCC(O)=O)CCc2n1					=	8.2	0.14	6		<	4.5		4		2.87
